# Supplementary material
Source: Springer Nature journal article supplement (https://www.springermedizin.de/resource/supplementary/13014_2014_1146_MOESM7_ESM.pdf/9634998)

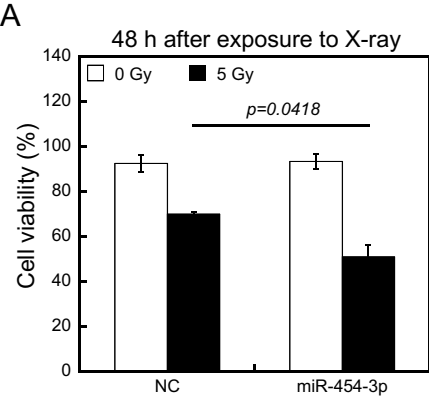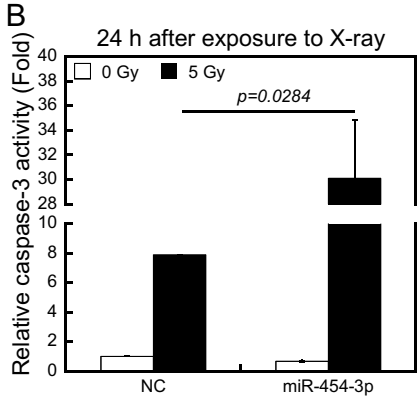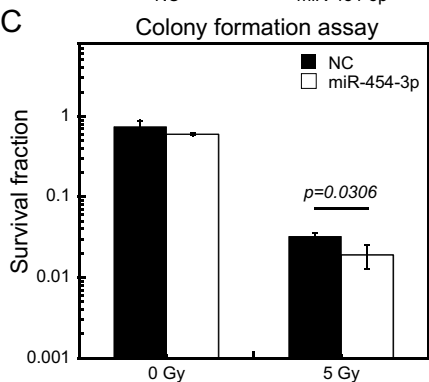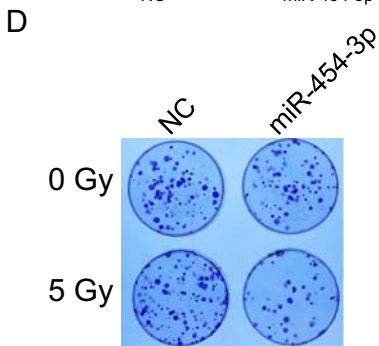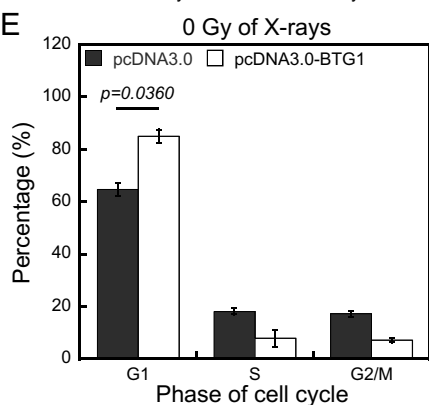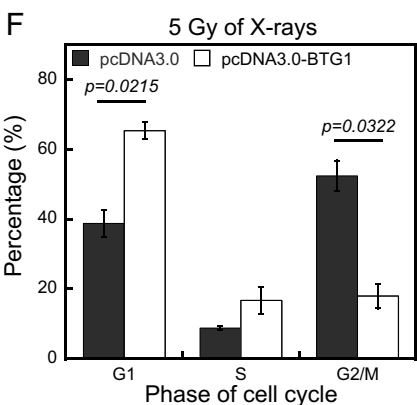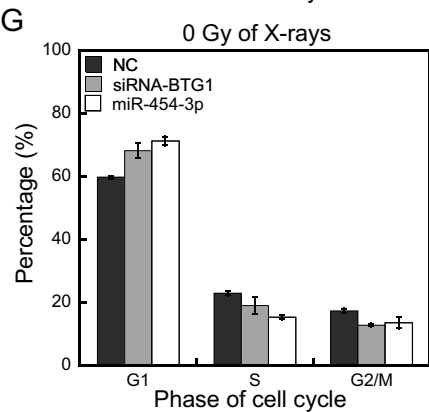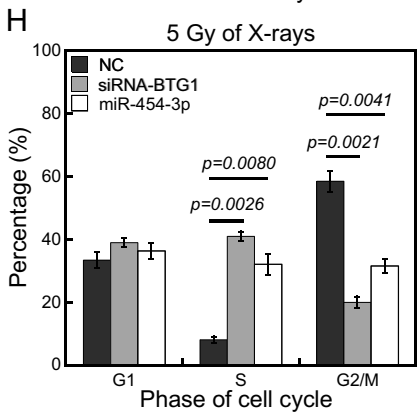

Supplement: MOESM7 [file 9634998]
